# Supplementary material for: Racial Impact on Inpatient Stroke Quality of Care in Two Community Hospitals
Source: Preprints.org preprint supplement (doi:10.20944/preprints202311.0040.v1), 2023-11-01
Supplement: Supplementary file 1 [file supplementary]

**Supplementary Tables**

**Table S1**: Frequency and percent of missing data for the whole sample cohort

| Variable | Whole Missing | Whole Missing % | White Missing | White Missing % | Non-White Missing | Non-White Missing % |
| --- | --- | --- | --- | --- | --- | --- |
| Race is White | 28 | 2.0 | 0 | 0.0 | 0 | 0.0 |
| Age | 0 | 0.0 | 0 | 0.0 | 0 | 0.0 |
| Gender | 0 | 0.0 | 0 | 0.0 | 0 | 0.0 |
| Country of Origin | 9 | 0.6 | 7 | 0.6 | 1 | 0.5 |
| Primary Language | 2 | 0.1 | 1 | 0.1 | 1 | 0.5 |
| Interpreter | 5 | 0.4 | 4 | 0.4 | 1 | 0.5 |
| Medical History | 0 | 0.0 | 0 | 0.0 | 0 | 0.0 |
| Stroke Type | 0 | 0.0 | 0 | 0.0 | 0 | 0.0 |
| Patient Arrival Mode | 83 | 5.9 | 68 | 5.9 | 12 | 5.4 |
| Systolic BP | 64 | 4.6 | 55 | 4.8 | 8 | 3.6 |
| Diastolic BP | 72 | 5.1 | 57 | 4.9 | 14 | 6.3 |
| Glucose Blood Level | 103 | 7.3 | 83 | 7.2 | 19 | 8.5 |
| Disposition | 0 | 0.0 | 0 | 0.0 | 0 | 0.0 |
| Mortality (30 days) | 24 | 1.7 | 19 | 1.6 | 4 | 1.8 |
| Length of Stay | 0 | 0.0 | 0 | 0.0 | 0 | 0.0 |
| Ambulatory state (prior) | 1 | 0.1 | 1 | 0.1 | 0 | 0.0 |
| Ambulatory state (discharge) | 288 | 20.5 | 242 | 20.9 | 34 | 15.3 |
| Readmission (30 days) | 10 | 0.7 | 8 | 0.7 | 2 | 0.9 |
| A1C | 459 | 32.6 | 381 | 32.9 | 71 | 31.8 |
| LDL | 384 | 27.3 | 314 | 27.1 | 59 | 26.5 |
| EF | 341 | 24.2 | 280 | 24.2 | 54 | 24.2 |
| Antihypertensives in ED | 81 | 5.8 | 65 | 5.6 | 16 | 7.2 |
| LKW to Arrival | 337 | 23.9 | 272 | 23.5 | 58 | 26.0 |
| Door to CT | 310 | 22.0 | 262 | 22.6 | 44 | 19.7 |
| Intubation in ED | 68 | 4.8 | 51 | 4.4 | 17 | 7.6 |

**Table S2**: Frequency and percent of missing data for the acute ischemic stroke cohort

| Variable | Whole Missing | Whole Missing % | White Missing | White Missing % | Non-White Missing | Non-White Missing % |
| --- | --- | --- | --- | --- | --- | --- |
| Race is White | 22 | 2.2 | 0 | 0.0 | 0 | 0.0 |
| Age | 0 | 0.0 | 0 | 0.0 | 0 | 0.0 |
| Gender | 0 | 0.0 | 0 | 0.0 | 0 | 0.0 |
| Country of Origin | 7 | 0.7 | 6 | 0.7 | 1 | 0.6 |
| Primary Language | 1 | 0.1 | 1 | 0.1 | 0 | 0.0 |
| Interpreter | 3 | 0.3 | 3 | 0.4 | 0 | 0.0 |
| Medical History | 0 | 0.0 | 0 | 0.0 | 0 | 0.0 |
| Patient Arrival Mode | 74 | 7.3 | 62 | 7.5 | 9 | 5.5 |
| Systolic BP | 19 | 1.9 | 14 | 1.7 | 4 | 2.4 |
| Diastolic BP | 56 | 5.5 | 45 | 5.4 | 10 | 6.1 |
| Glucose Blood Level | 74 | 7.3 | 61 | 7.3 | 12 | 7.3 |
| Disposition | 0 | 0.0 | 0 | 0.0 | 0 | 0.0 |
| Mortality (30 days) | 18 | 1.8 | 13 | 1.6 | 4 | 2.4 |
| Length of Stay | 0 | 0.0 | 0 | 0.0 | 0 | 0.0 |
| Ambulatory state (prior) | 1 | 0.1 | 1 | 0.1 | 0 | 0.0 |
| Ambulatory state (discharge) | 114 | 11.2 | 93 | 11.2 | 11 | 6.7 |
| Readmission (30 days) | 7 | 0.7 | 5 | 0.6 | 2 | 1.2 |
| A1C | 255 | 25.0 | 209 | 25.1 | 40 | 24.2 |
| LDL | 175 | 17.2 | 144 | 17.3 | 23 | 13.9 |
| EF | 175 | 17.2 | 141 | 17.0 | 29 | 17.6 |
| Antihypertensives in ED | 62 | 6.1 | 51 | 6.1 | 11 | 6.7 |
| Initial NIHSS 1 | 260 | 25.5 | 207 | 24.9 | 46 | 27.9 |
| NIHSS (24 hours) | 311 | 30.5 | 255 | 30.7 | 48 | 29.1 |
| LKW to Arrival | 269 | 26.4 | 218 | 26.2 | 46 | 27.9 |
| IV Thrombolytic received (this hospital) | 1 | 0.1 | 1 | 0.1 | 0 | 0.0 |
| Door to CT | 226 | 22.2 | 189 | 22.7 | 34 | 20.6 |

**Table S3**: Frequency and percent of missing data for the transient ischemic attack cohort

| Variable | Whole Missing | Whole Missing % | White Missing | White Missing % | Non-White Missing | Non-White Missing % |
| --- | --- | --- | --- | --- | --- | --- |
| Race is White | 1 | 0.5 | 0 | 0.0 | 0 | 0.0 |
| Age | 0 | 0.0 | 0 | 0.0 | 0 | 0.0 |
| Gender | 0 | 0.0 | 0 | 0.0 | 0 | 0.0 |
| Country of Origin | 0 | 0.0 | 0 | 0.0 | 0 | 0.0 |
| Primary Language | 0 | 0.0 | 0 | 0.0 | 0 | 0.0 |
| Interpreter | 1 | 0.5 | 1 | 0.5 | 0 | 0.0 |
| Medical History | 0 | 0.0 | 0 | 0.0 | 0 | 0.0 |
| Patient Arrival Mode | 3 | 1.4 | 2 | 1.0 | 1 | 5.3 |
| Systolic BP | 36 | 16.7 | 34 | 17.4 | 2 | 10.5 |
| Diastolic BP | 10 | 4.6 | 7 | 3.6 | 3 | 15.8 |
| Glucose Blood Level | 18 | 8.3 | 14 | 7.1 | 4 | 21.1 |
| Disposition | 0 | 0.0 | 0 | 0.0 | 0 | 0.0 |
| Mortality (30 days) | 3 | 1.4 | 3 | 1.5 | 0 | 0.0 |
| Mortality (90 days) | 6 | 2.8 | 6 | 3.1 | 0 | 0.0 |
| Length of Stay | 0 | 0.0 | 0 | 0.0 | 0 | 0.0 |
| Ambulatory state (prior) | 0 | 0.0 | 0 | 0.0 | 0 | 0.0 |
| Ambulatory state (discharge) | 100 | 46.3 | 94 | 48.0 | 5 | 26.3 |
| Readmission (30 days) | 2 | 0.9 | 2 | 1.0 | 0 | 0.0 |
| A1C | 92 | 42.6 | 86 | 43.9 | 6 | 31.6 |
| LDL | 80 | 37.0 | 74 | 37.8 | 6 | 31.6 |
| EF | 71 | 32.9 | 63 | 32.1 | 8 | 42.1 |
| Antihypertensives in ED | 12 | 5.6 | 8 | 4.1 | 4 | 21.1 |
| Initial NIHSS 1 | 66 | 30.6 | 59 | 30.1 | 6 | 31.6 |
| LKW to Arrival | 20 | 9.3 | 18 | 9.2 | 2 | 10.5 |
| EKG | 8 | 3.7 | 5 | 2.6 | 3 | 15.8 |
| TTE | 8 | 3.7 | 5 | 2.6 | 3 | 15.8 |
| TEE | 29 | 13.4 | 23 | 11.7 | 6 | 31.6 |
| CT Angio | 9 | 4.2 | 6 | 3.1 | 3 | 15.8 |
| MRA | 73 | 33.8 | 65 | 33.2 | 7 | 36.8 |

**Table S4**: Frequency and percent of missing data for the intracerebral hemorrhage cohort

| Variable | Whole Missing | Whole Missing % | White Missing | White Missing % | Non-White Missing | Non-White Missing % |
| --- | --- | --- | --- | --- | --- | --- |
| Race is White | 3 | 2.5 | 0 | 0.0 | 0 | 0.0 |
| Age | 0 | 0.0 | 0 | 0.0 | 0 | 0.0 |
| Gender | 0 | 0.0 | 0 | 0.0 | 0 | 0.0 |
| Country of Origin | 1 | 0.8 | 1 | 1.1 | 0 | 0.0 |
| Primary Language | 1 | 0.8 | 0 | 0.0 | 1 | 3.6 |
| Interpreter | 1 | 0.8 | 0 | 0.0 | 1 | 3.6 |
| Medical History | 0 | 0.0 | 0 | 0.0 | 0 | 0.0 |
| Patient Arrival Mode | 4 | 3.3 | 2 | 2.2 | 2 | 7.1 |
| Systolic BP | 5 | 4.1 | 4 | 4.4 | 1 | 3.6 |
| Diastolic BP | 5 | 4.1 | 5 | 5.5 | 0 | 0.0 |
| Glucose Blood Level | 7 | 5.7 | 6 | 6.6 | 1 | 3.6 |
| Disposition | 0 | 0.0 | 0 | 0.0 | 0 | 0.0 |
| Mortality (30 days) | 3 | 2.5 | 3 | 3.3 | 0 | 0.0 |
| Length of Stay | 0 | 0.0 | 0 | 0.0 | 0 | 0.0 |
| Ambulatory state (prior) | 0 | 0.0 | 0 | 0.0 | 0 | 0.0 |
| Ambulatory state (discharge) | 50 | 41.0 | 39 | 42.9 | 11 | 39.3 |
| Readmission (30 days) | 1 | 0.8 | 1 | 1.1 | 0 | 0.0 |
| A1C | 72 | 59.0 | 56 | 61.5 | 16 | 57.1 |
| Antihypertensives in ED | 6 | 4.9 | 6 | 6.6 | 0 | 0.0 |
| LKW to Arrival | 31 | 25.4 | 21 | 23.1 | 9 | 32.1 |
| Door to CT | 8 | 6.6 | 6 | 6.6 | 2 | 7.1 |
| Glasgow Coma Scale | 20 | 16.4 | 13 | 14.3 | 7 | 25.0 |
| Intubation in ED | 11 | 9.0 | 10 | 11.0 | 1 | 3.6 |
| EVD Placement | 7 | 5.7 | 7 | 7.7 | 0 | 0.0 |
| Decompressive Craniectomy | 7 | 5.7 | 7 | 7.7 | 0 | 0.0 |
| Hematoma Evacuation | 7 | 5.7 | 7 | 7.7 | 0 | 0.0 |

**Table S5**: Frequency and percent of missing data for the subarachnoid hemorrhage cohort

| Variable | Whole Missing | Whole Missing % | White Missing | White Missing % | Non-White Missing | Non-White Missing % |
| --- | --- | --- | --- | --- | --- | --- |
| Race is White | 2 | 4.9 | 0 | 0.0 | 0 | 0.0 |
| Age | 0 | 0.0 | 0 | 0.0 | 0 | 0.0 |
| Gender | 0 | 0.0 | 0 | 0.0 | 0 | 0.0 |
| Country of Origin | 1 | 2.4 | 0 | 0.0 | 0 | 0.0 |
| Primary Language | 0 | 0.0 | 0 | 0.0 | 0 | 0.0 |
| Interpreter | 0 | 0.0 | 0 | 0.0 | 0 | 0.0 |
| Medical History | 0 | 0.0 | 0 | 0.0 | 0 | 0.0 |
| Patient Arrival Mode | 2 | 4.9 | 2 | 6.5 | 0 | 0.0 |
| Systolic BP | 3 | 7.3 | 2 | 6.5 | 1 | 12.5 |
| Diastolic BP | 1 | 2.4 | 0 | 0.0 | 1 | 12.5 |
| Glucose Blood Level | 3 | 7.3 | 1 | 3.2 | 2 | 25.0 |
| Disposition | 0 | 0.0 | 0 | 0.0 | 0 | 0.0 |
| Mortality (30 days) | 0 | 0.0 | 0 | 0.0 | 0 | 0.0 |
| Length of Stay | 0 | 0.0 | 0 | 0.0 | 0 | 0.0 |
| Ambulatory state (prior) | 0 | 0.0 | 0 | 0.0 | 0 | 0.0 |
| Ambulatory state (discharge) | 23 | 56.1 | 15 | 48.4 | 7 | 87.5 |
| Readmission (30 days) | 0 | 0.0 | 0 | 0.0 | 0 | 0.0 |
| Antihypertensives in ED | 1 | 2.4 | 0 | 0.0 | 1 | 12.5 |
| LKW to Arrival | 13 | 31.7 | 11 | 35.5 | 1 | 12.5 |
| Door to CT | 1 | 2.4 | 0 | 0.0 | 1 | 12.5 |
| Glasgow Coma Scale | 7 | 17.1 | 2 | 6.5 | 5 | 62.5 |
| Intubation in ED | 1 | 2.4 | 0 | 0.0 | 1 | 12.5 |
| EVD Placement | 1 | 2.4 | 0 | 0.0 | 1 | 12.5 |
| Aneurysm Coiling | 1 | 2.4 | 0 | 0.0 | 1 | 12.5 |
| Aneurysm Clipping | 2 | 4.9 | 1 | 3.2 | 1 | 12.5 |
| CT Angio | 1 | 2.4 | 0 | 0.0 | 1 | 12.5 |
| MRA | 16 | 39.0 | 10 | 32.3 | 4 | 50.0 |

**Table S6**: Reasons for not administering IV thrombolysis

|  | White (n=620) | Non-White (n=112) |
| --- | --- | --- |
| Elevated blood pressure (SBP>185 mm Hg or DBP>110 mm Hg) despite treatment | 11 (1.3%) | 0 |
| Recent intracranial or spinal surgery or significant head trauma or prior stroke in previous 3 months | 24 (3.9%) | 8 (7.1%) |
| History of previous intracranial hemorrhage, intracranial neoplasm, arteriovenous malformation or aneurysm | 11 (1.8%) | 3 (2.7%) |
| Active internal bleeding | 2 (0.3%) | 0 |
| Acute bleeding diathesis (low platelet count, increased PTT, INR≥1.7, or use of NOAC) | 76 (12.3%) | 7 (6.3%) |
| Symptoms suggest subarachnoid hemorrhage | 1 (0.2%) | 0 |
| CT demonstrates multilobar infarction (hypodensity>1/3 cerebral hemisphere) | 0 | 1 (0.9%) |
| Care-team unable to determine eligibility | 316 (51%) | 75 (67%) |
| IV or IA thrombolysis/thrombectomy at an outside hospital prior to arrival | 8 (1.3%) | 2 (1.8) |
| Life expectancy<1 year or severe co-morbid illness or CMO on admission | 10 (1.6%) | 0 |
| Pregnancy | 0 | 0 |
| Patient/family refusal | 7 (1.1%) | 2 (1.8%) |
| Stroke severity too mild (non-disabling) | 144 (23.2%) | 13 (11.6%) |
| Seizure at onset with postictal residual neurological impairments | 0 | 1 (0.9%) |
| Major surgery or serious trauma within previous 14 days | 7 (1.1%) | 0 |
| Recent gastrointestinal or urinary tract hemorrhage (within previous 21 days) | 3 (0.5%) | 0 |
